# Supplementary material
Source: publisher figshare collection journal article supplement (https://acs.figshare.com/ndownloader/files/25018629)
Supplement: Supplementary file 1 [file 25018629]

## Sheet: harmonic frequencies
νi	Acenaphthene S0	Frequency (cm-1)	Intensity	Acenaphthene S1	Frequency (cm-1)	Intensity	Acenaphthene-d10 S0	Frequency (cm-1)	Intensity	Acenaphthene-d10 S1	Frequency (cm-1)	Intensity	Naphthalene S0	Frequency (cm-1)	Intensity	Naphthalene S1	Frequency (cm-1)	Intensity	Phenanthrene S0	Frequency (cm-1)	Intensity	Phenanthrene S1	Frequency (cm-1)	Intensity	Anthracene S0	Frequency (cm-1)	Intensity	Anthracene S1	Frequency (cm-1)	Intensity
1		86.9472	0		50.0125	0		69.165	0		38.2809	0		175.692	2.8971		149.57	0		98.6233	0		83.4108	0		92.1523	1.4572		85.0119	1.6551
2		167.513	1.6191		157.307	2.2714		152.943	1.2506		142.906	0.9425		187.601	0		159.085	4.1367		102.188	0.9427		93.0967	0.6268		122.654	0		109.254	0
3		221.637	9.3828		176.39	6.2513		197.146	8.4666		157.831	6.9153		363.781	1.5813		252.284	0		231.087	4.1814		208.334	5.8266		234.994	1.528		230.331	0
4		237.246	0		200.76	0		212.064	0		180.213	0		397.403	0		355.705	1.657		246.81	0		212.225	0		238.934	0		232.108	1.1381
5		423.072	1.697		267.379	0		389.448	1.5518		243.304	0		482.506	0		379.433	13.6813		248.078	0.4681		239.434	3.4704		271.146	0		248.655	0
6		453.235	0.7559		409.186	1.2445		407.644	0		377.451	1.2759		489.32	23.5363		467.458	0		406.685	0		375.404	0.0007		392.849	0.0356		321.929	0.8607
7		453.969	0		419.945	72.1356		410.898	0.6521		380.112	60.7075		516.964	0		472.526	0		411.049	0.5271		375.445	4.7449		394.23	0		384.564	0
8		478.083	0.2118		458.645	0.3505		421.889	0.0646		397.279	1.8894		518.861	0		473.356	0		439.845	7.813		401.394	2.7116		397.668	0		392.826	0
9		510.072	0.0816		476.37	0.4421		488.599	4.7358		436.327	0		633.203	0		504.598	0		445.865	1.9179		436.292	20.9475		484.343	25.2975		417.883	19.7971
10		550.1	1.0754		497.17	0.5419		494.777	0.098		440.419	0.2693		634.366	3.2997		561.345	210.647		505.088	0.9839		472.327	3.4214		489.977	0		429.378	0
11		573.101	1.1323		526.89	0		530.107	0.8159		461.894	0.0112		729.593	0		680.382	0		510.304	5.3227		476.486	0		507.098	0		507.729	0
12		631.858	0		534.249	1.3193		539.925	0		515.014	1.3123		772.845	0		689.238	0		547.961	0		495.631	10.6047		534.067	0		523.831	0
13		644.595	0.0009		622.311	87.5174		586.657	0		537.027	69.1097		782.123	0		689.271	156.305		556.716	0.2728		519.782	0.0003		589.086	0		531.317	0
14		664.618	3.7287		637.359	1.0739		605.575	0.0416		544.828	0		801.091	129.971		731.767	0		600.287	0		520.447	25.6064		616.543	8.3451		599.443	32.575
15		762.258	0		687.909	0		618.628	13.002		589.664	4.2703		806.532	0.215		757.326	0		630.731	5.2996		598.902	39.6992		640.786	0		605.454	0
16		767.458	11.7808		688.203	108.37		631.286	3.7248		591.235	82.4066		848.736	0		794.831	8.9864		723.049	0.0691		667.649	13.2203		660.471	0.6162		663.462	2.2391
17		802.689	84.9221		710.965	19.9009		639.436	40.609		598.895	0.4609		897.884	0		819.993	0		725.876	1.8348		689.282	2.8779		742.718	93.3		700.284	0
18		814.385	0.4645		781.274	0		710.142	0		632.843	0		948.301	0		842.175	0		726.251	2.2203		700.224	125.752		753.044	0		712.805	0
19		836.967	0.7806		800.611	9.3835		733.861	0.1095		677.362	0.0011		955.195	0		850.935	15.6393		749.16	90.912		701.761	0		764.064	0		716.972	115.416
20		858.248	16.169		812.099	1.8205		750.458	0.0106		727.084	0.2954		975.652	4.3568		915.652	0		769.524	0		712.138	60.3908		772.395	0		721.84	0
21		890.113	0		812.823	10.9357		764.883	1.8623		732.867	9.6046		992.442	0		921.235	0		799.479	0		725.514	0		778.344	0		752.369	0
22		916.066	0.0653		840.755	8.814		772.356	0.0641		739.755	0		999.736	0		923.758	0		829.975	63.3743		773.394	33.3859		822.932	0.114		775.832	0
23		950.919	0.5792		909.678	0		796.3	0.0008		744.663	0.0722		1039.41	8.6877		1012.65	47.1405		842.328	0.074		806.3	0		847.028	0		823.449	111.01
24		974.691	0		911.636	0.8406		796.591	0		759.599	3.2127		1051.12	0		1049.74	0		879.145	0		819.687	13.2927		869.062	0		837.803	0
25		984.875	1.7828		945.359	4.3705		829.121	1.8907		786.587	1.3296		1153.92	5.1638		1062.22	0		885.214	12.7303		831.122	3.9959		901.618	63.1587		839.799	45.6061
26		1013.97	0.4731		1000.07	0		832.444	0.3844		824.846	8.7211		1177.04	0		1087.48	1.1127		888.434	1.9421		858.911	1.4324		916.616	1.871		883.311	0
27		1038.23	0		1002.37	40.5443		851.933	0.7751		832.768	0.3464		1181.07	0.7962		1184.68	0		953.199	0		873.931	0		919.881	0		891.872	0
28		1041.69	4.7226		1004.6	0.4541		852.726	2.7602		835.977	0		1192.1	0		1185.45	1.8642		963.167	3.9164		891.164	15.4349		926.826	0		900.846	27.0684
29		1069.92	0.2881		1057.34	5.7753		881.411	3.2547		855.144	19.795		1238.01	0.7239		1235.66	0.0116		981.175	0		921.195	0		968.474	0		906.929	0.101
30		1108.08	2.0414		1064.85	0.2844		885.907	0		868.439	0.0077		1274.62	0		1251.61	0		994.813	0.0602		931.763	0		975.27	10.1072		915.27	0
31		1178.99	0.0038		1146.87	0.0412		927.135	0.0023		885.332	0.0804		1293.63	7.9396		1291.25	12.9431		995.097	0		933.08	0		994.317	0		945.042	0
32		1186.36	0.3604		1174.77	3.4108		941.49	0		918.1	0		1404.65	0.5787		1406.82	0		1015.52	2.2941		986.396	2.4915		995.673	0		947.445	0
33		1203.76	2.4036		1182.44	5.3015		968.806	0.0006		953.862	8.0276		1410.64	0		1417.71	10.7392		1065.91	6.8906		1046.96	7.0392		1032.2	8.0586		1050.49	8.3354
34		1240.38	0.6377		1196.07	0.2038		989.007	0.024		986.012	0.5523		1426.03	3.161		1429.93	0		1067.17	1.5395		1051.19	0.8287		1035.93	0		1051.9	0
35		1249.15	0		1206.84	0		1021.93	0.1437		1002.14	26.8943		1498	0		1448.81	0.0095		1118.11	1.9794		1093.03	10.5938		1130.33	0		1090.8	0
36		1256.46	0.0235		1234.09	1.3312		1035.95	0.0339		1020.65	0.4087		1502.08	0		1487.82	0		1171.2	2.1939		1134.53	35.9083		1172.37	1.4304		1128.85	4.8008
37		1257.57	1.5479		1243.7	23.6604		1077.8	0.0575		1039.33	28.3672		1558.33	6.9903		1491.1	0		1183.82	0.0147		1153.4	1.2486		1178.34	7.3201		1181.2	0.367
38		1286.83	0.8259		1289.48	4.326		1112.12	1.2217		1091.58	4.01		1621.51	0		1499.22	5.3258		1195.1	0.3173		1169.47	6.3122		1197.4	1.6707		1191.93	0
39		1319.58	0.8455		1316.22	141.672		1121.57	0.3866		1118.03	2.857		1647.32	2.6931		1579.15	56.6867		1197.16	0.4476		1190.25	0.0644		1197.47	0		1218.58	0
40		1399.05	0.5315		1405	15.0726		1136.11	3.8141		1123.24	7.5231		1677.52	0		1612.57	0		1232.84	1.484		1244.12	7.9292		1220.07	0		1225.05	5.8241
41		1403.55	15.634		1422.33	8.7588		1199.65	0.7122		1187.93	31.6475		3171.88	0		3181.21	0		1248.57	0.3806		1255.33	0.2883		1295.74	7.2482		1273.02	0
42		1459.13	1.1128		1428.03	4.9607		1316.16	3.6876		1309.53	18.1707		3173.78	9.4506		3183.91	41.1655		1276.67	11.2713		1270.32	11.5904		1297.59	0		1289.1	15.4816
43		1474.94	0.6814		1429.96	10.2133		1341.85	10.6928		1311.27	9.8727		3175.59	0.9928		3184.48	22.1646		1309.78	0.0172		1291.42	29.5072		1305.85	0		1298.64	0
44		1489.87	1.9139		1452.3	1.3575		1349.21	0.5803		1340.35	15.5849		3179.06	0		3188.36	0		1332.03	1.7962		1357.79	9.3712		1343.21	4.0171		1309.33	3.9056
45		1511.09	0.7652		1470.05	10.4301		1429.73	1.9383		1416.02	0.2202		3190.5	0		3197.96	0		1383.26	0.1426		1399.03	5.45		1389.82	3.8045		1375.05	0.4566
46		1517.4	3.2628		1479.05	0.254		1450.28	0.602		1420.85	0.0004		3191.65	68.8599		3199.75	38.4288		1387.68	1.2157		1407.89	2.4725		1423.62	0		1424.1	0
47		1542.2	3.2983		1495.71	5.4968		1497.37	0.2968		1422.4	0.518		3203.5	55.1014		3214.8	54.7974		1455.75	0.3539		1446.6	11.5478		1428.77	1.2295		1427.29	0
48		1643.55	0.5931		1512.51	0.9111		1605.11	0.2061		1479.56	0.1547		3204.59	0		3215.92	0		1463.14	1.0483		1453.68	22.6935		1438.96	0		1452.09	1.3034
49		1645.37	24.523		1558.89	20.3455		1629.46	22.7063		1497.88	13.2962								1479.75	2.6883		1465.43	67.0511		1494.04	0.9434		1469.13	11.6006
50		1666.62	9.0468		1626.83	4.3041		1644.18	7.775		1605.26	6.1699								1500.98	9.4523		1474.91	8.1685		1494.1	0.9073		1488.06	81.5335
51		3045.33	20.5378		2988.29	131.329		2215.33	11.3847		2173.57	62.4743								1545.45	5.4995		1524.82	31.3612		1527.87	0		1532.94	0
52		3055.91	52.6137		2996.85	0		2223.96	23.3108		2187.07	24.6242								1572.99	1.822		1531.66	1.6725		1589.08	6.2334		1537.02	0
53		3069.04	0		3006.83	58.3445		2278.26	0		2223.62	0								1616.43	0.0995		1550.49	26.857		1602.36	0		1565.58	0
54		3088.79	30.3746		3022.83	47.7808		2287.61	17.8327		2236.67	27.2525								1651.95	1.8368		1560.42	58.2777		1630.98	0		1580.04	15.6744
55		3172.88	0.0106		3181.71	7.1334		2338.61	0.3264		2340.74	9.087								1663.83	0.0993		1565.9	52.6994		1676.41	0		1598.14	0
56		3173.23	1.7229		3184.01	1.8713		2339.5	0.8348		2345.94	0.6183								1669.1	0.1672		1638.01	18.6461		1677.71	4.1494		1608.98	1.0323
57		3182.4	8.8433		3190.55	19.7072		2351.46	5.0997		2352.33	23.1053								3172.27	0.1648		3178.18	3.0894		3169.14	13.3325		3168.7	16.2186
58		3183.24	37.6113		3192.21	30.3412		2352.01	20.8105		2354.91	18.9034								3175.08	5.5073		3180.77	1.6033		3170.92	0		3170.06	0.0001
59		3196.71	56.9312		3207.47	61.1916		2366.57	26.4393		2374.14	32.4139								3176.05	3.709		3182.39	4.5759		3174.86	0		3179.2	0
60		3197.83	16.9848		3208.53	7.2332		2367.11	10.3834		2374.9	2.2701								3185.15	0.0074		3188.85	14.7789		3175.5	18.1493		3179.88	28.661
61																				3186.67	17.2537		3189.54	42.5366		3178.97	0.0012		3182.37	18.2199
62																				3192.35	41.2407		3196	29.1953		3180.28	0		3183.55	0
63																				3199.79	47.2114		3209.99	40.8488		3193.27	0		3196.44	0
64																				3203.16	0.6302		3213.26	0.663		3193.52	71.4542		3196.77	46.6729
65																				3209.31	21.8168		3216.64	25.4145		3205.73	70.7703		3211.31	100.428
66																				3223.26	26.5426		3231.65	14.7813		3206.18	0		3211.98	0
